# Supplementary material for: El nuevo marco legal de la sociedad mercantil estatal
Source: MDPI journal article supplement (doi:10.3390/md20070464), 2004-01-01
Supplement: s1 [file s1]

# New Glycosylated Secondary Metabolites from Marine-Derived Bacteria

Cao Van Anh <sup>1,2</sup>, Jong Soon Kang <sup>3</sup>, Hwa-Sun Lee <sup>1</sup>, Phan Thi Hoai Trinh <sup>4</sup>, Chang-Su Heo <sup>1,2</sup> and Hee Jae Shin <sup>1,2,\*</sup>

<sup>1</sup> Marine Natural Products Chemistry Laboratory, Korea Institute of Ocean Science and Technology, 385 Haeyang-ro, Yeongdo-gu, Busan 49111, Korea; caovananh@kiost.ac.kr (C.V.A.); hwasunlee@kiost.ac.kr (H.-S.L.); science30@kiost.ac.kr (C.-S.H.)

<sup>2</sup> Department of Marine Biotechnology, University of Science and Technology (UST), 217 Gajungro, Yuseong-gu, Daejeon 34113, Korea

<sup>3</sup> Laboratory Animal Resource Center, Korea Research Institute of Bioscience and Biotechnology, 30 Yeongudanjiro, Cheongju 28116, Korea; kanjon@kribb.re.kr

<sup>4</sup> Department of Marine Biotechnology, Nhatrang Institute of Technology Research and Application, Vietnam Academy of Science and Technology, 02 Hung Vuong, Nha Trang 650000, Vietnam; phanhoaitrinh84@gmail.com

\* Correspondence: shinhj@kiost.ac.kr; Tel.: +82-51-664-3341; Fax: +82-51-664-3340

## Contents

|                                                                                                          |    |
|----------------------------------------------------------------------------------------------------------|----|
| <b>Figure S1.</b> $^1\text{H}$ NMR spectrum of <b>1</b> ( $\text{CD}_3\text{OD}$ , 600 MHz). .....       | 3  |
| <b>Figure S2.</b> $^{13}\text{C}$ NMR spectrum of <b>1</b> ( $\text{CD}_3\text{OD}$ , 150 MHz). .....    | 3  |
| <b>Figure S3.</b> HSQC spectrum of <b>1</b> ( $\text{CD}_3\text{OD}$ ). .....                            | 4  |
| <b>Figure S4.</b> $^1\text{H}$ - $^1\text{H}$ COSY spectrum of <b>1</b> ( $\text{CD}_3\text{OD}$ ).....  | 5  |
| <b>Figure S5.</b> HMBC spectrum of <b>1</b> ( $\text{CD}_3\text{OD}$ ). .....                            | 6  |
| <b>Figure S5.</b> HMBC spectrum of <b>1</b> ( $\text{CD}_3\text{OD}$ ) (extended H-4). .....             | 7  |
| <b>Figure S6.</b> $^1\text{H}$ NMR spectrum of <b>1</b> ( $\text{DMSO}-d_6$ , 600 MHz). .....            | 8  |
| <b>Figure S7.</b> $^{13}\text{C}$ NMR spectrum of <b>1</b> ( $\text{DMSO}-d_6$ , 150 MHz). .....         | 8  |
| <b>Figure S8.</b> HSQC spectrum of <b>1</b> ( $\text{DMSO}-d_6$ ). .....                                 | 9  |
| <b>Figure S9.</b> $^1\text{H}$ - $^1\text{H}$ COSY spectrum of <b>1</b> ( $\text{DMSO}-d_6$ ). .....     | 10 |
| <b>Figure S10.</b> HMBC spectrum of <b>1</b> ( $\text{DMSO}-d_6$ ). .....                                | 11 |
| <b>Figure S11.</b> NOESY spectrum of <b>1</b> ( $\text{DMSO}-d_6$ ). .....                               | 12 |
| <b>Figure S12.</b> HRESIMS data of <b>1</b> .....                                                        | 13 |
| <b>Figure S13.</b> $^1\text{H}$ NMR spectrum of <b>2</b> ( $\text{CD}_3\text{OD}$ , 600 MHz). .....      | 14 |
| <b>Figure S14.</b> $^{13}\text{C}$ NMR spectrum of <b>2</b> ( $\text{CD}_3\text{OD}$ , 150 MHz). .....   | 15 |
| <b>Figure S15.</b> HSQC spectrum of <b>2</b> ( $\text{CD}_3\text{OD}$ ). .....                           | 16 |
| <b>Figure S16.</b> $^1\text{H}$ - $^1\text{H}$ COSY spectrum of <b>2</b> ( $\text{CD}_3\text{OD}$ )..... | 17 |
| <b>Figure S17.</b> HMBC spectrum of <b>2</b> ( $\text{CD}_3\text{OD}$ ). .....                           | 18 |
| <b>Figure S18.</b> HRESIMS data of <b>2</b> .....                                                        | 19 |
| <b>Figure S19.</b> $^1\text{H}$ NMR spectrum of <b>3</b> ( $\text{CD}_3\text{OD}$ , 600 MHz). .....      | 20 |
| <b>Figure S20.</b> $^{13}\text{C}$ NMR spectrum of <b>3</b> ( $\text{CD}_3\text{OD}$ , 150 MHz). .....   | 20 |
| <b>Figure S21.</b> HSQC spectrum of <b>3</b> ( $\text{CD}_3\text{OD}$ ). .....                           | 21 |
| <b>Figure S22.</b> $^1\text{H}$ - $^1\text{H}$ COSY spectrum of <b>3</b> ( $\text{CD}_3\text{OD}$ )..... | 22 |
| <b>Figure S23.</b> HMBC spectrum of <b>3</b> ( $\text{CD}_3\text{OD}$ ). .....                           | 23 |
| <b>Figure S24.</b> HRESIMS data of <b>3</b> .....                                                        | 24 |
| <b>Figure S25.</b> Analysis of sugar moieties.....                                                       | 25 |
| <b>Figure S26.</b> Results of the cytotoxicity test of <b>1</b> . .....                                  | 26 |
| <b>Figure S27.</b> $^1\text{H}$ NMR spectrum of <b>4</b> ( $\text{DMSO}-d_6$ , 600 MHz).....             | 27 |
| <b>Figure S28.</b> $^1\text{H}$ NMR spectrum of <b>5</b> ( $\text{CD}_3\text{OD}$ , 600 MHz). .....      | 27 |
| <b>Figure S29.</b> $^1\text{H}$ NMR spectrum of <b>6</b> ( $\text{CD}_3\text{OD}$ , 600 MHz). .....      | 28 |

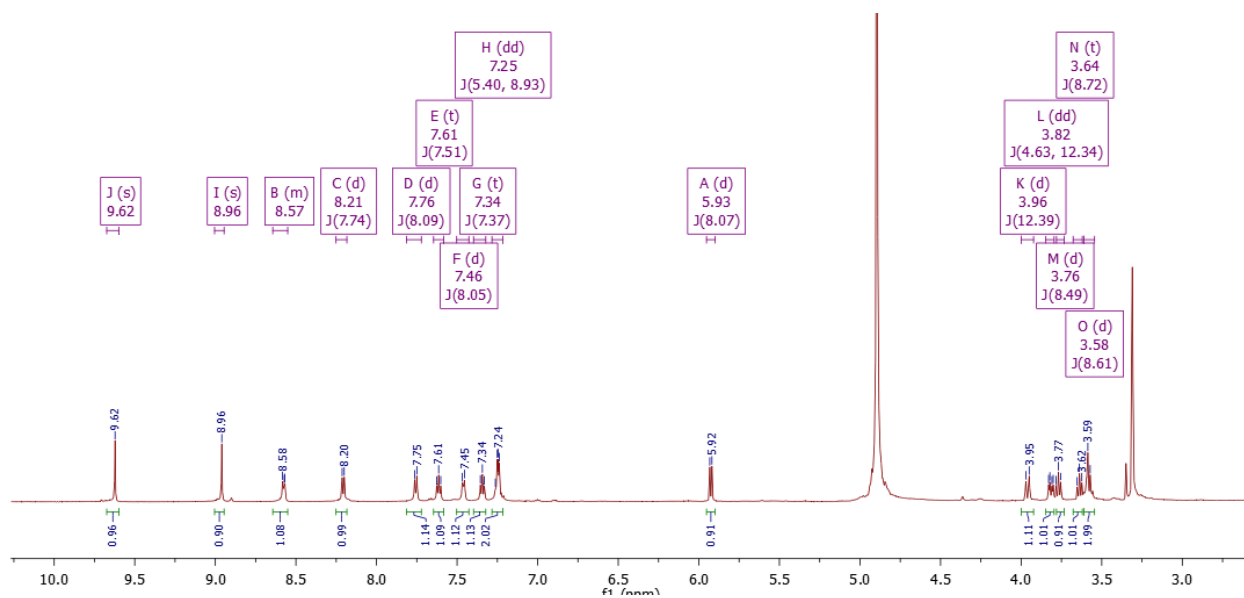

**Figure S1.**  $^1\text{H}$  NMR spectrum of 1 ( $\text{CD}_3\text{OD}$ , 600 MHz).

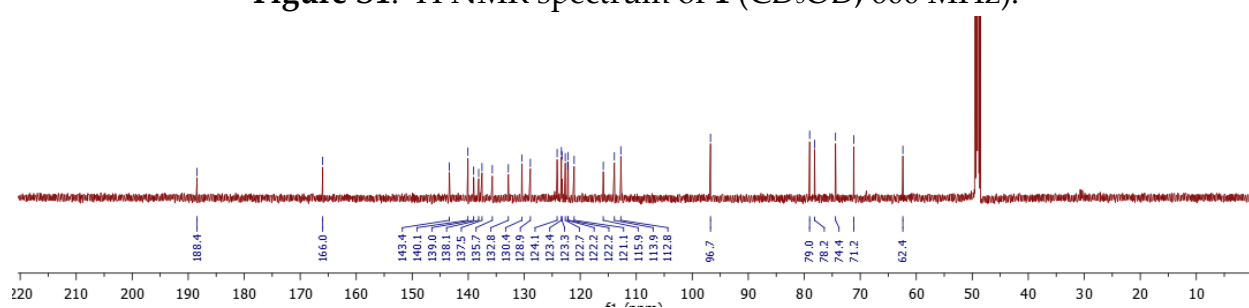

**Figure S2.**  $^{13}\text{C}$  NMR spectrum of 1 ( $\text{CD}_3\text{OD}$ , 150 MHz).

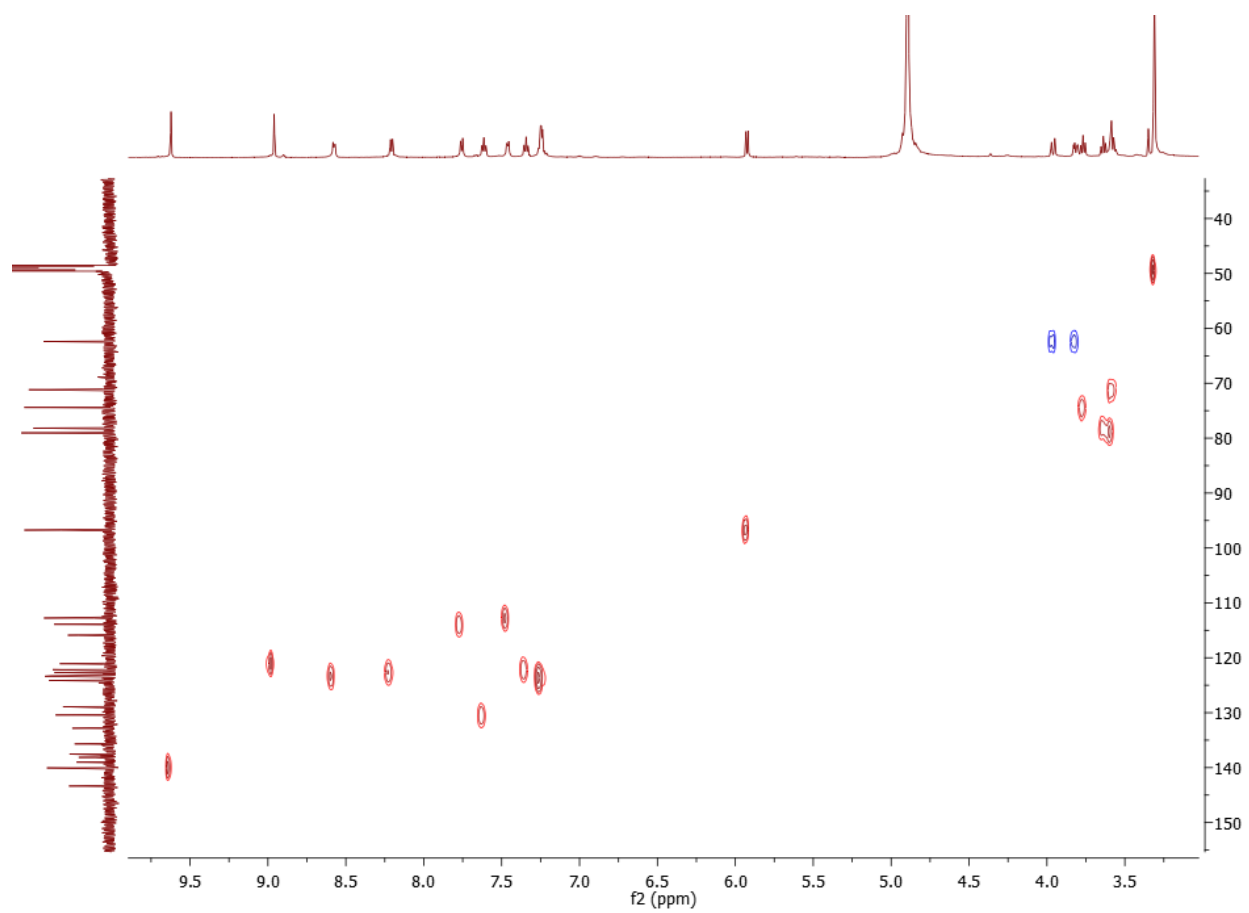

**Figure S3.** HSQC spectrum of **1** (CD<sub>3</sub>OD).

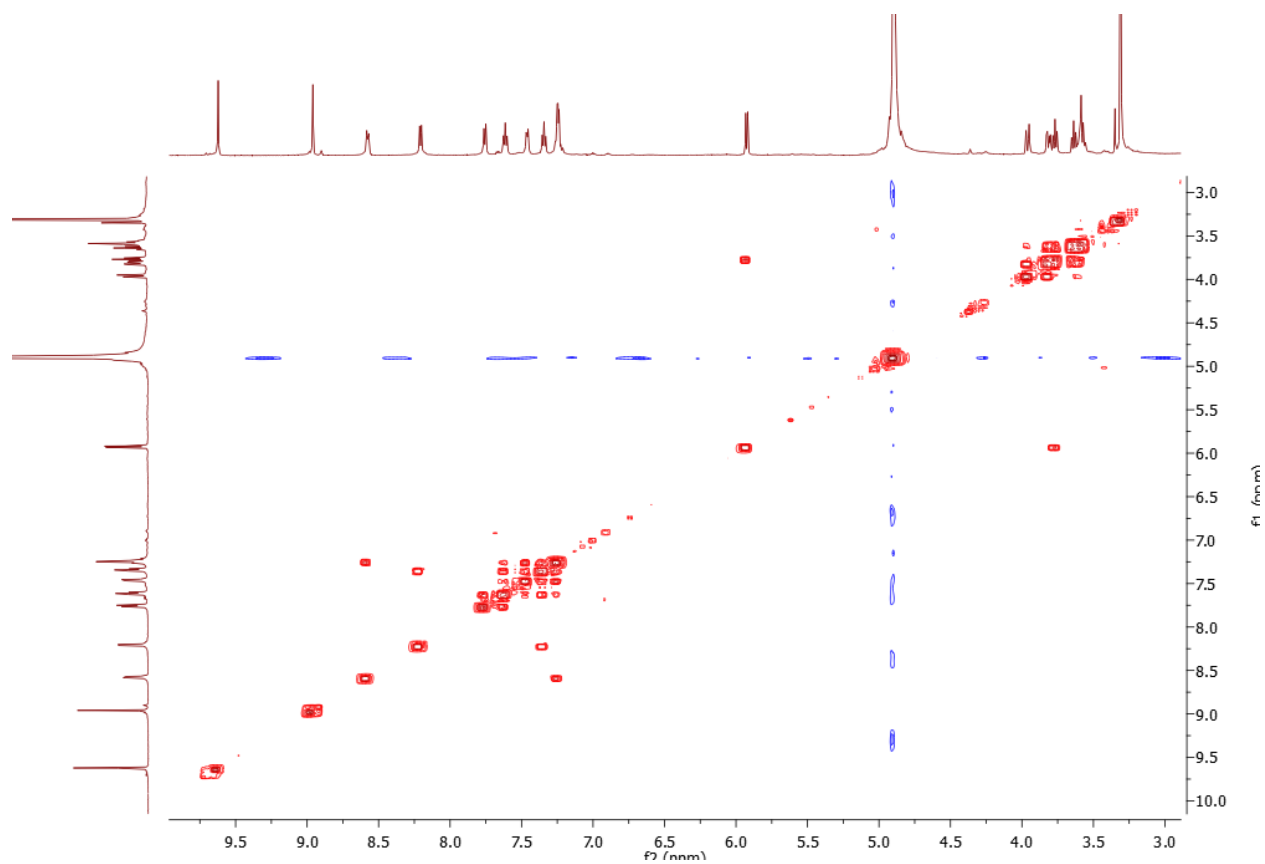

**Figure S4.**  $^1\text{H}$ - $^1\text{H}$  COSY spectrum of **1** ( $\text{CD}_3\text{OD}$ ).

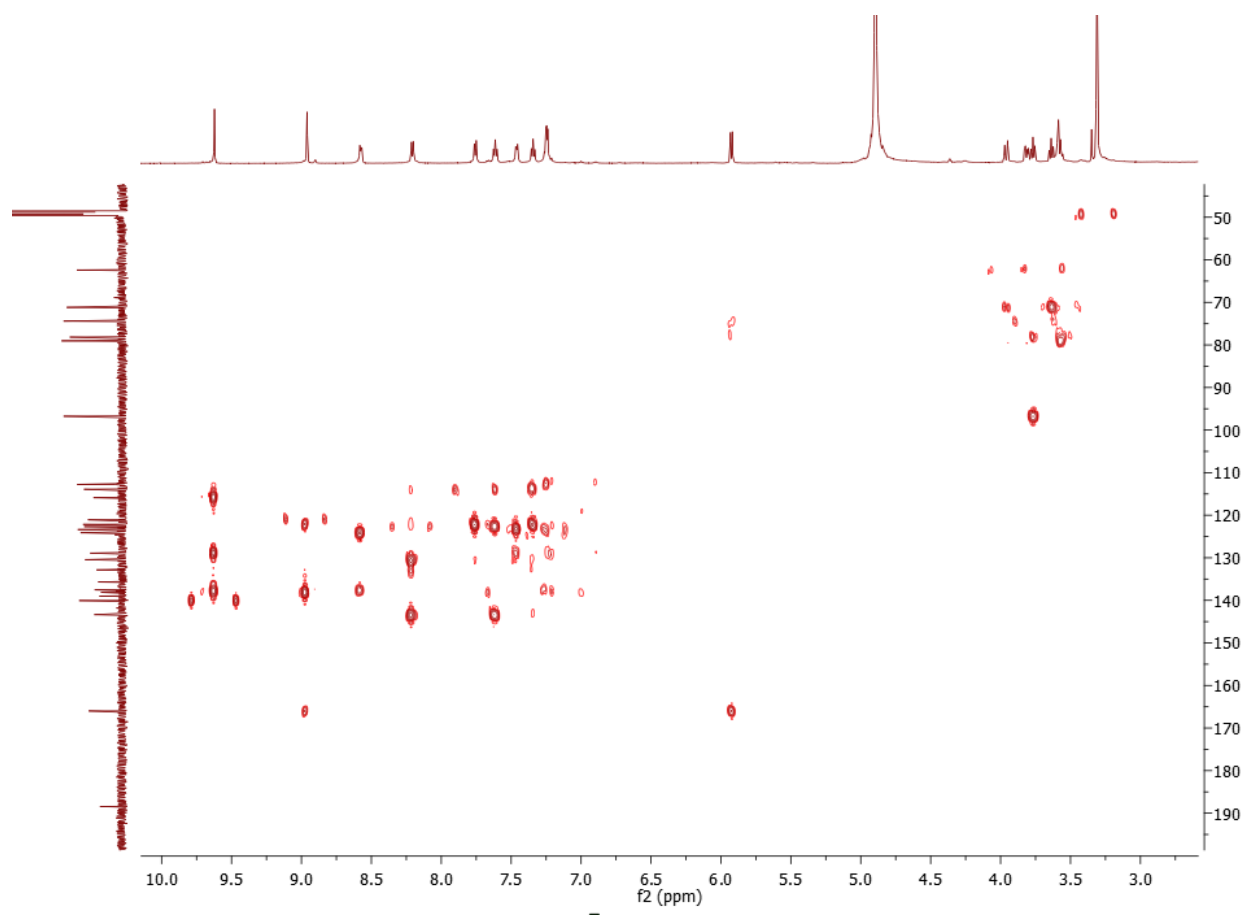

**Figure S5.** HMBC spectrum of **1** (CD<sub>3</sub>OD).

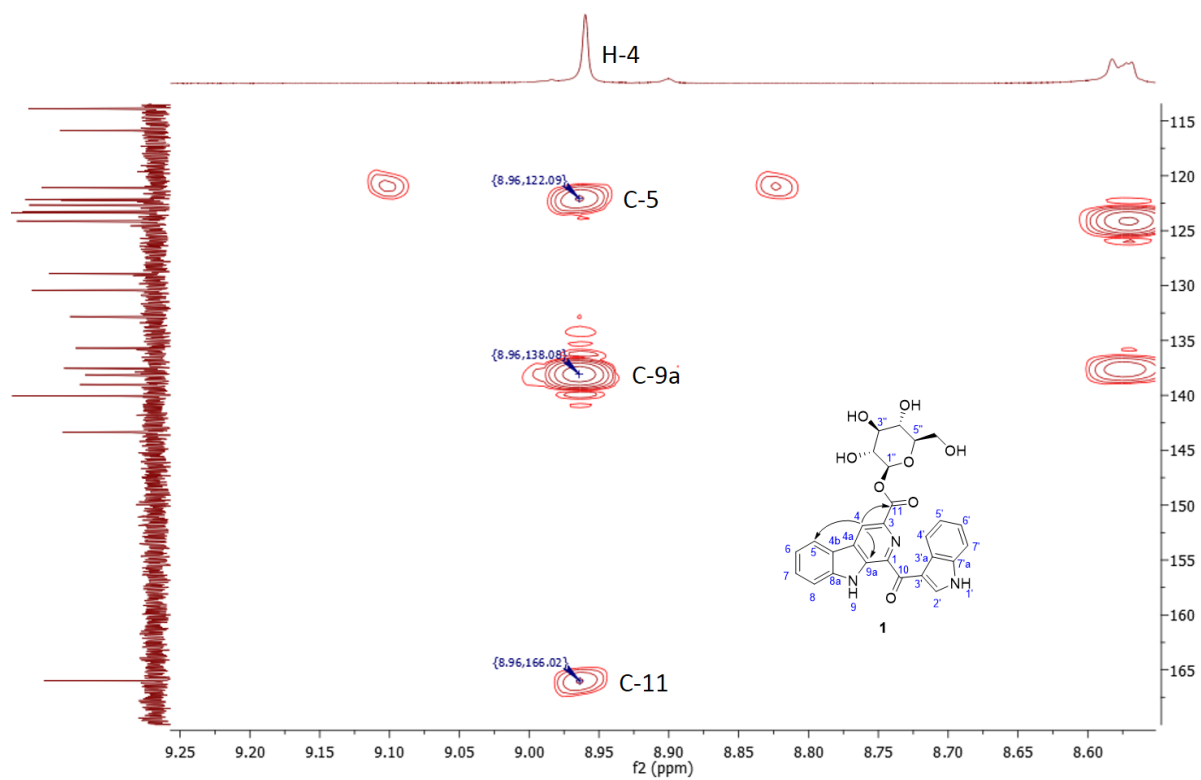

**Figure S5.** HMBC spectrum of **1** ( $\text{CD}_3\text{OD}$ ) (extended **H-4**).

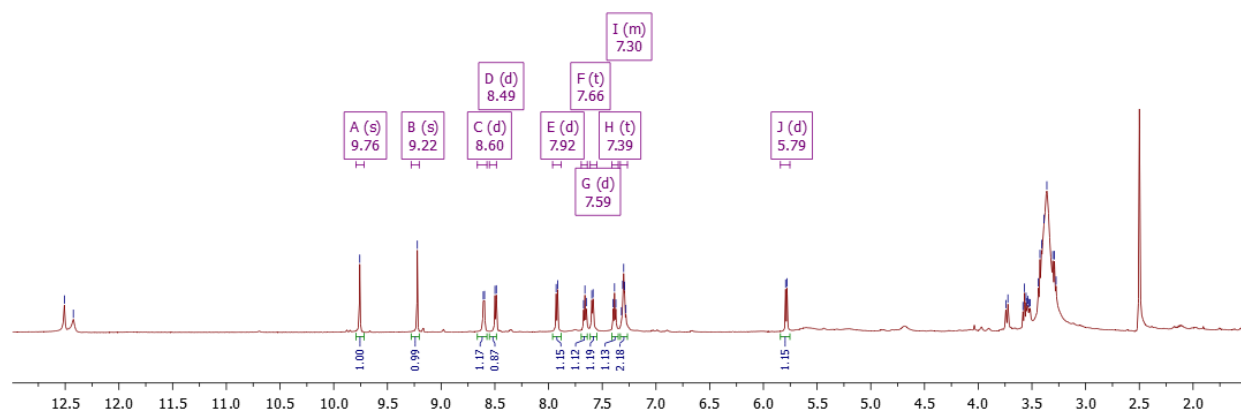

**Figure S6.**  $^1\text{H}$  NMR spectrum of **1** (DMSO- $d_6$ , 600 MHz).

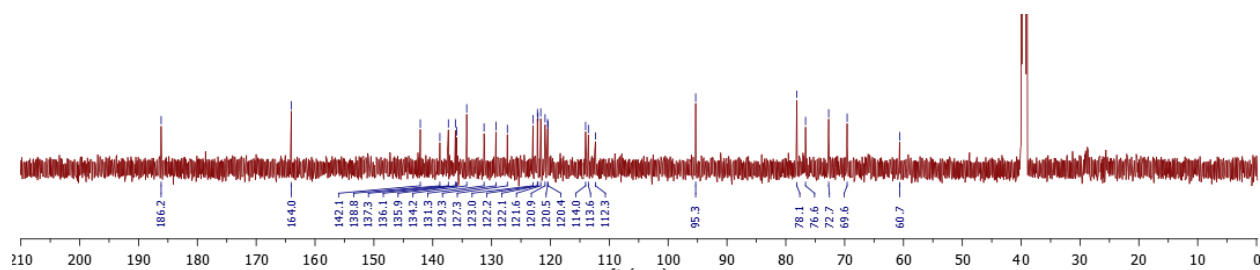

**Figure S7.**  $^{13}\text{C}$  NMR spectrum of **1** (DMSO- $d_6$ , 150 MHz).

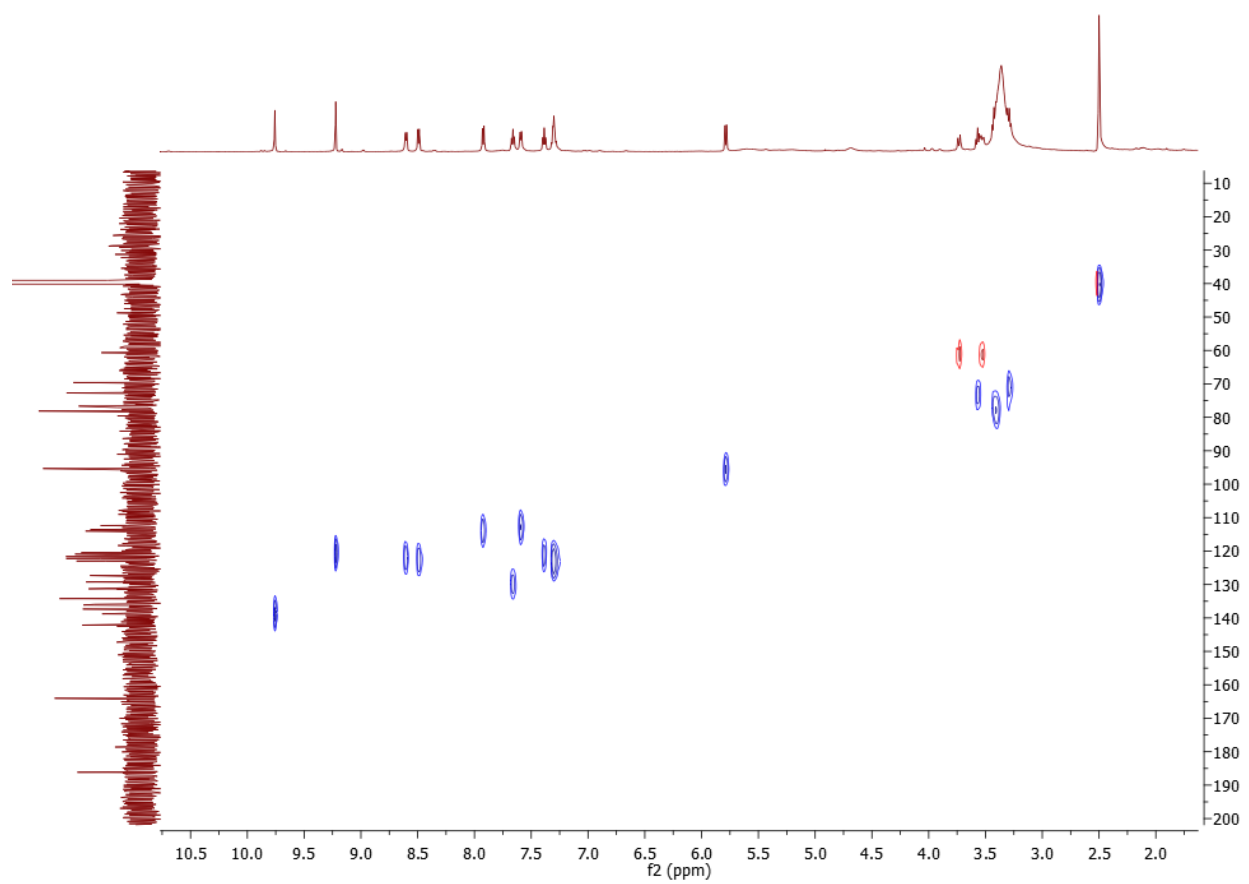

**Figure S8.** HSQC spectrum of **1** (DMSO-*d*<sub>6</sub>).

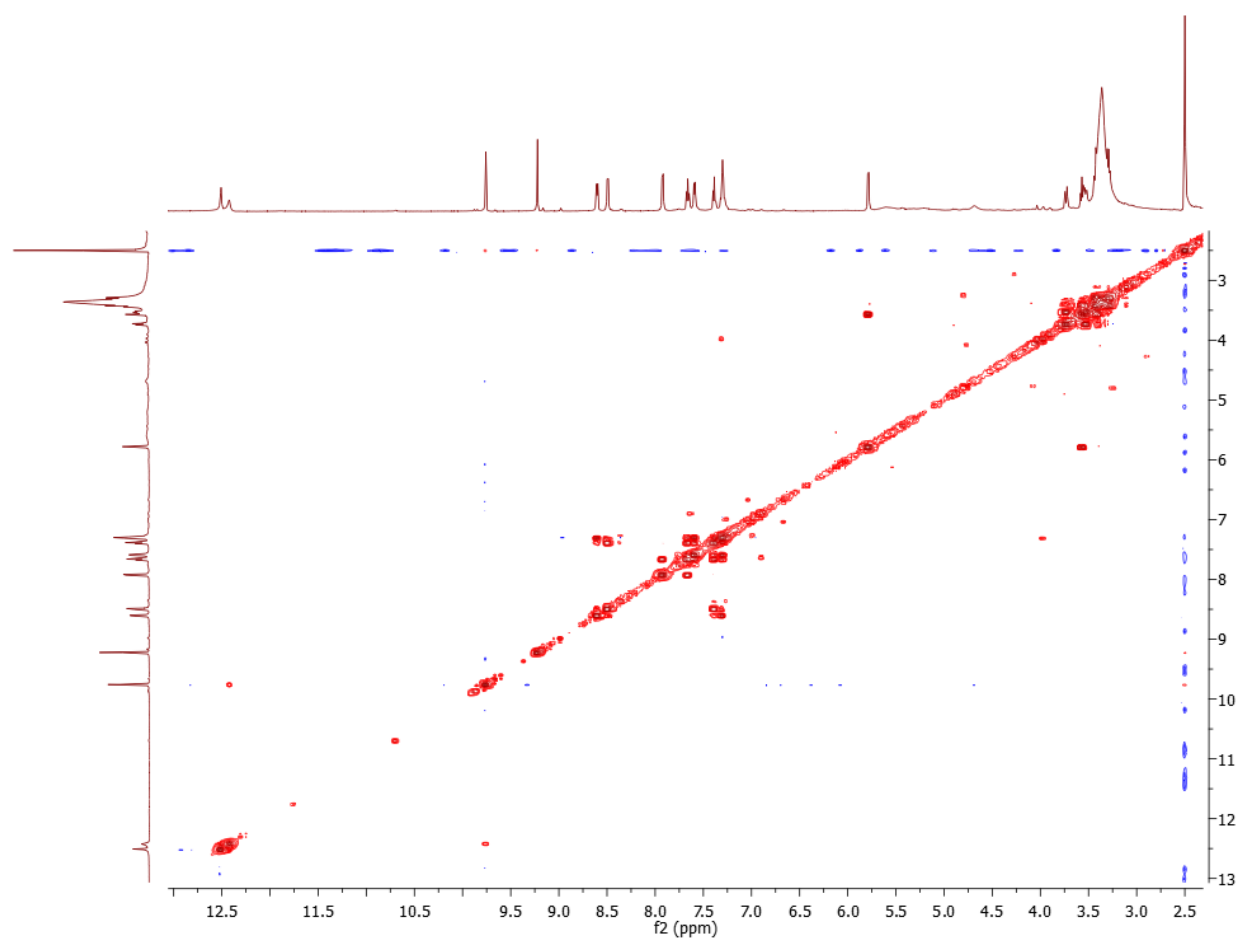

**Figure S9.**  $^1\text{H}$ - $^1\text{H}$  COSY spectrum of **1** (DMSO- $d_6$ ).

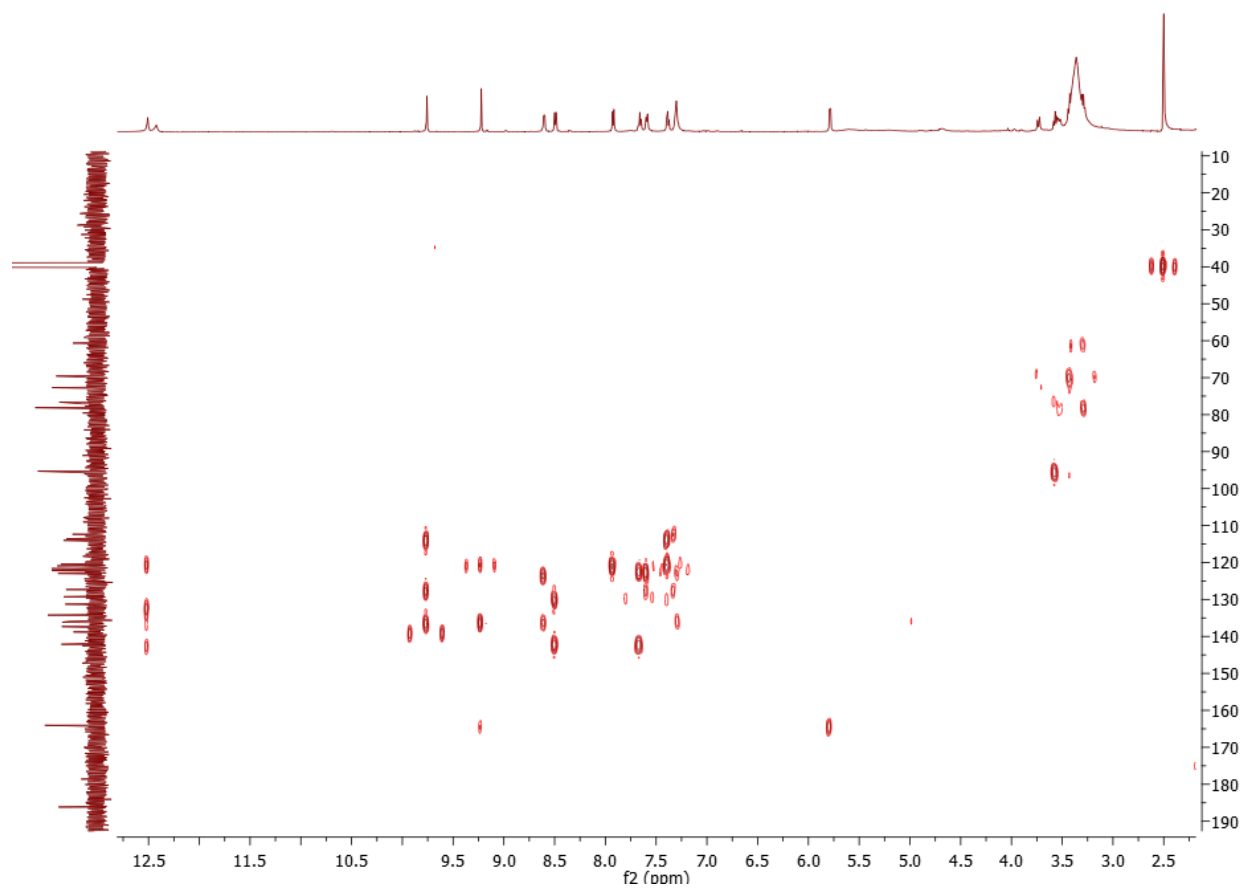

**Figure S10.** HMBC spectrum of **1** (DMSO-*d*<sub>6</sub>).

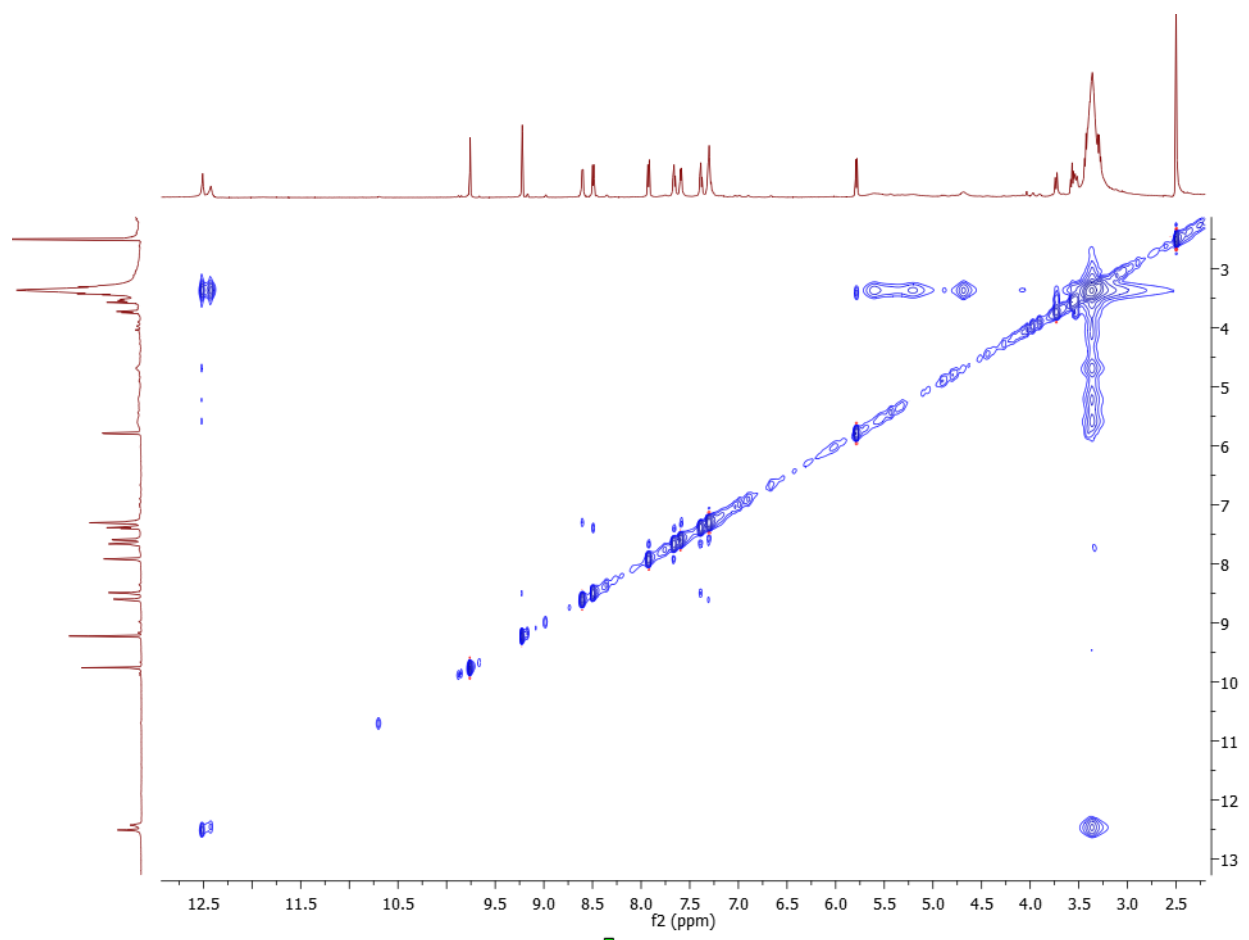

**Figure S11.** NOESY spectrum of **1** (DMSO-*d*<sub>6</sub>).

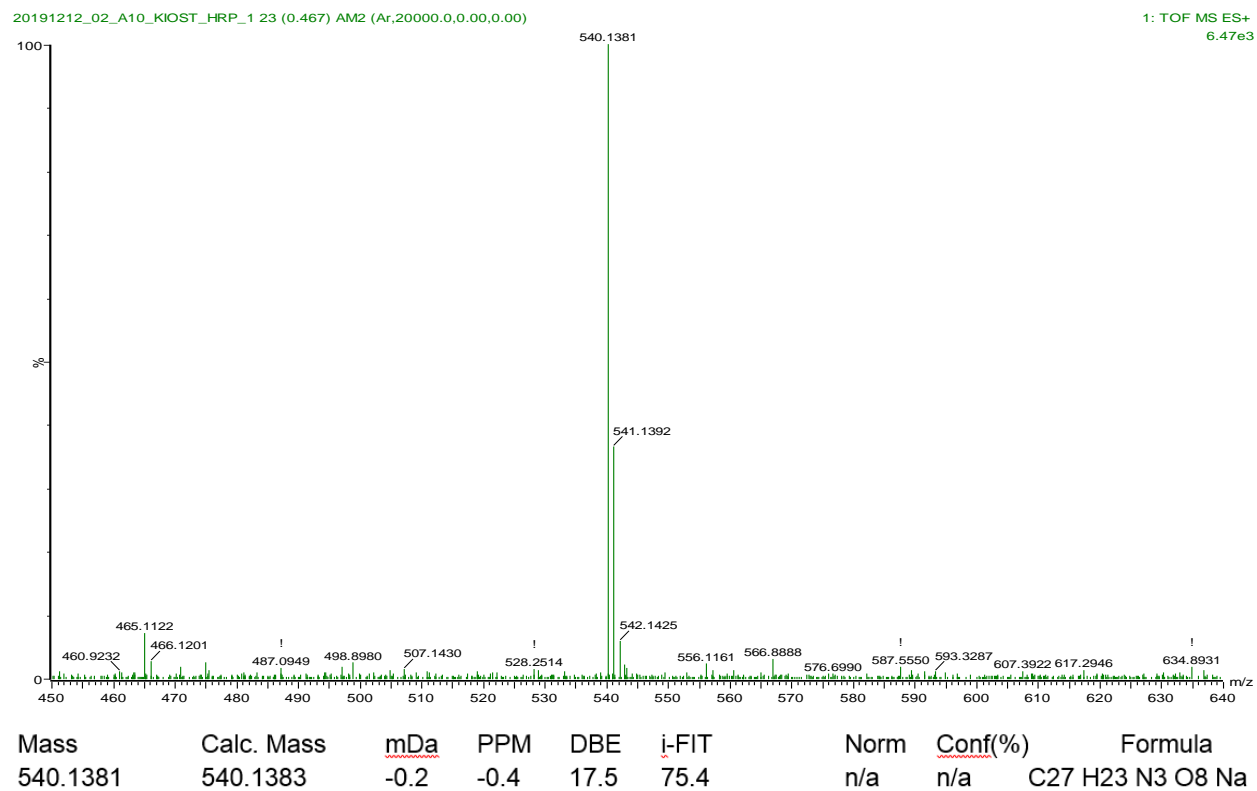

**Figure S12.** HRESIMS data of **1**.

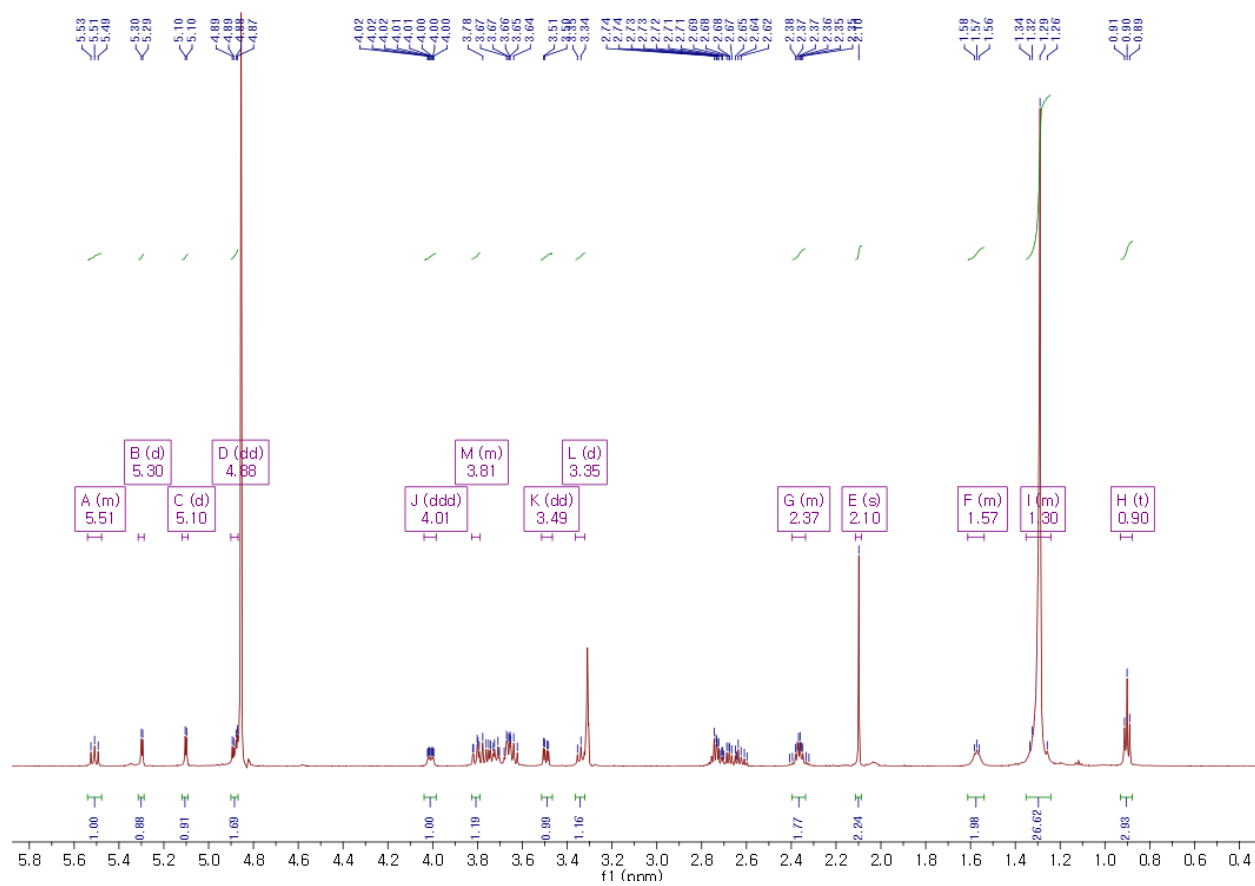

**Figure S13.** <sup>1</sup>H NMR spectrum of 2 (CD<sub>3</sub>OD, 600 MHz).

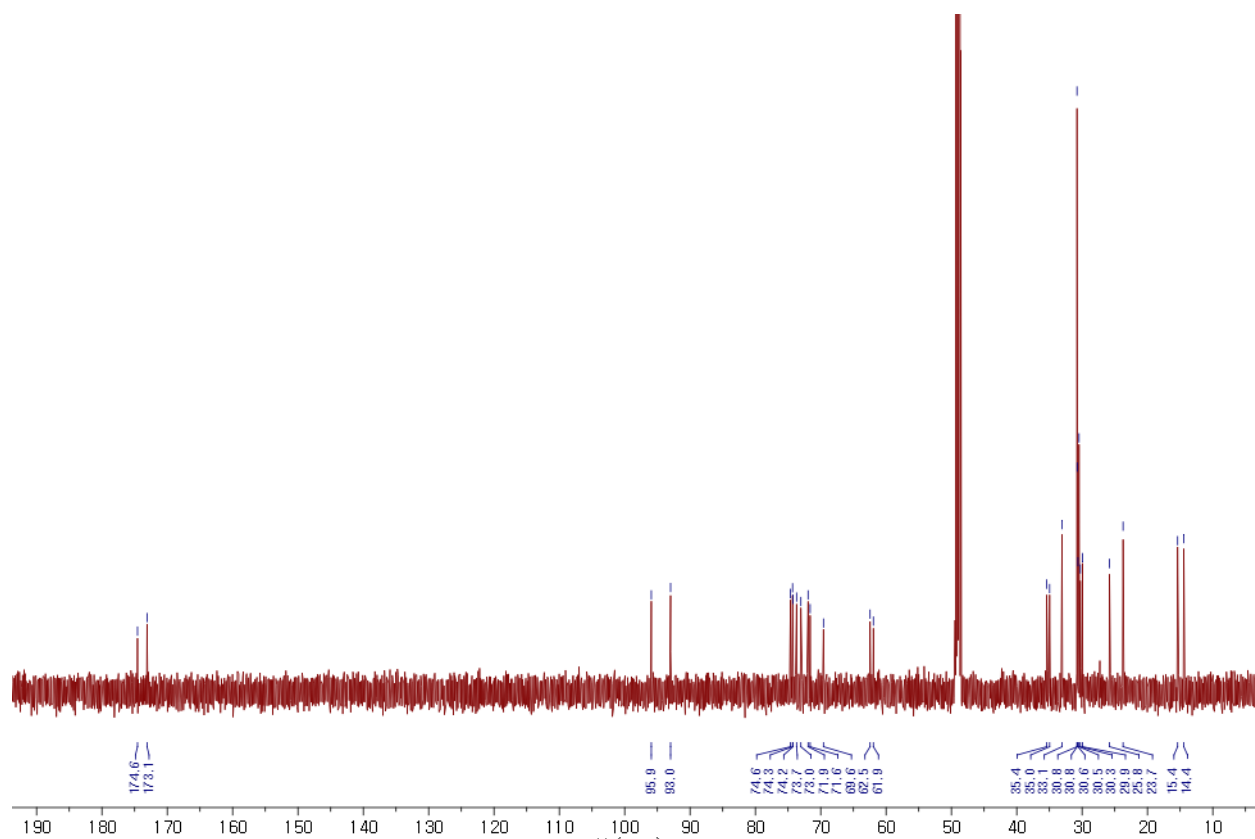

**Figure S14.**  $^{13}\text{C}$  NMR spectrum of **2** ( $\text{CD}_3\text{OD}$ , 150 MHz).

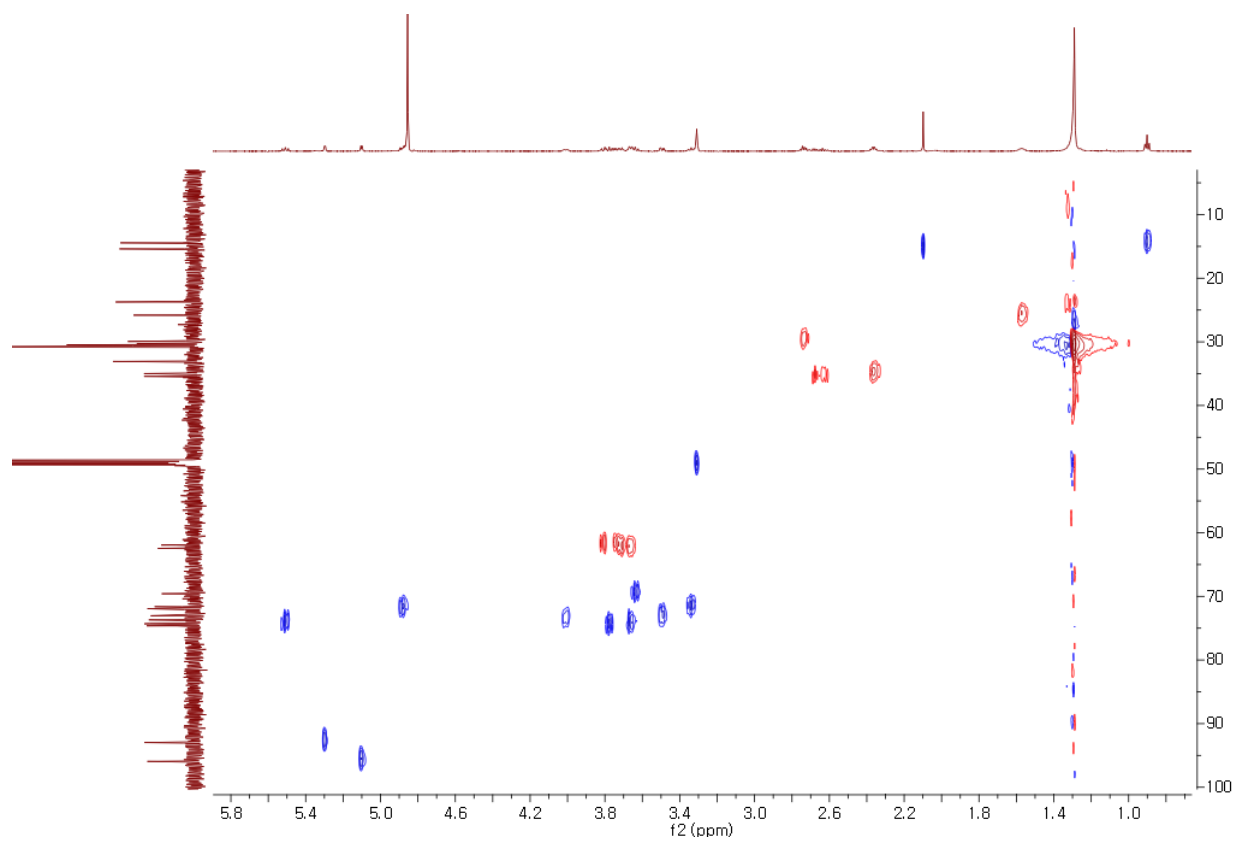

**Figure S15.** HSQC spectrum of **2** (CD<sub>3</sub>OD).

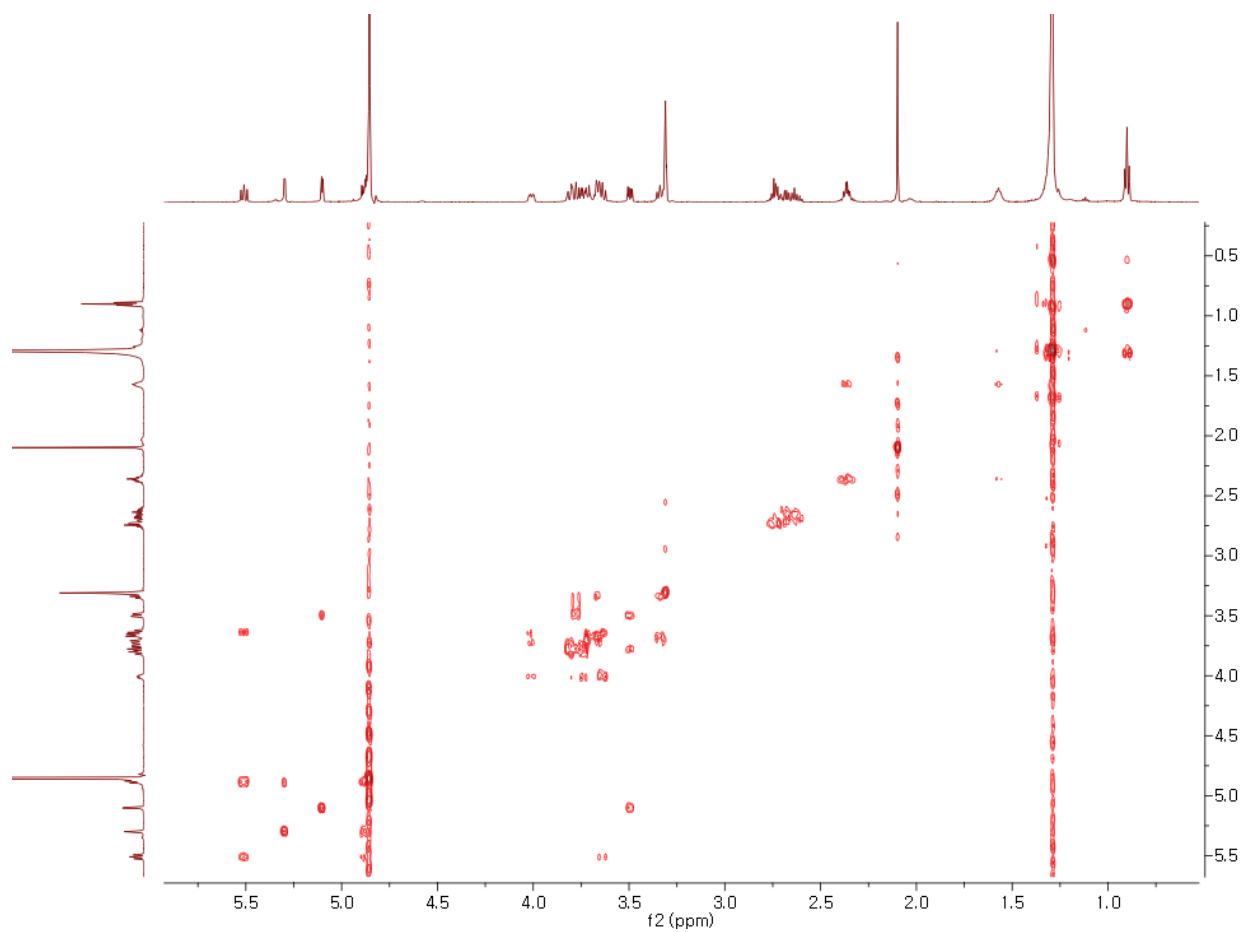

**Figure S16.**  $^1\text{H}$ - $^1\text{H}$  COSY spectrum of **2** ( $\text{CD}_3\text{OD}$ ).

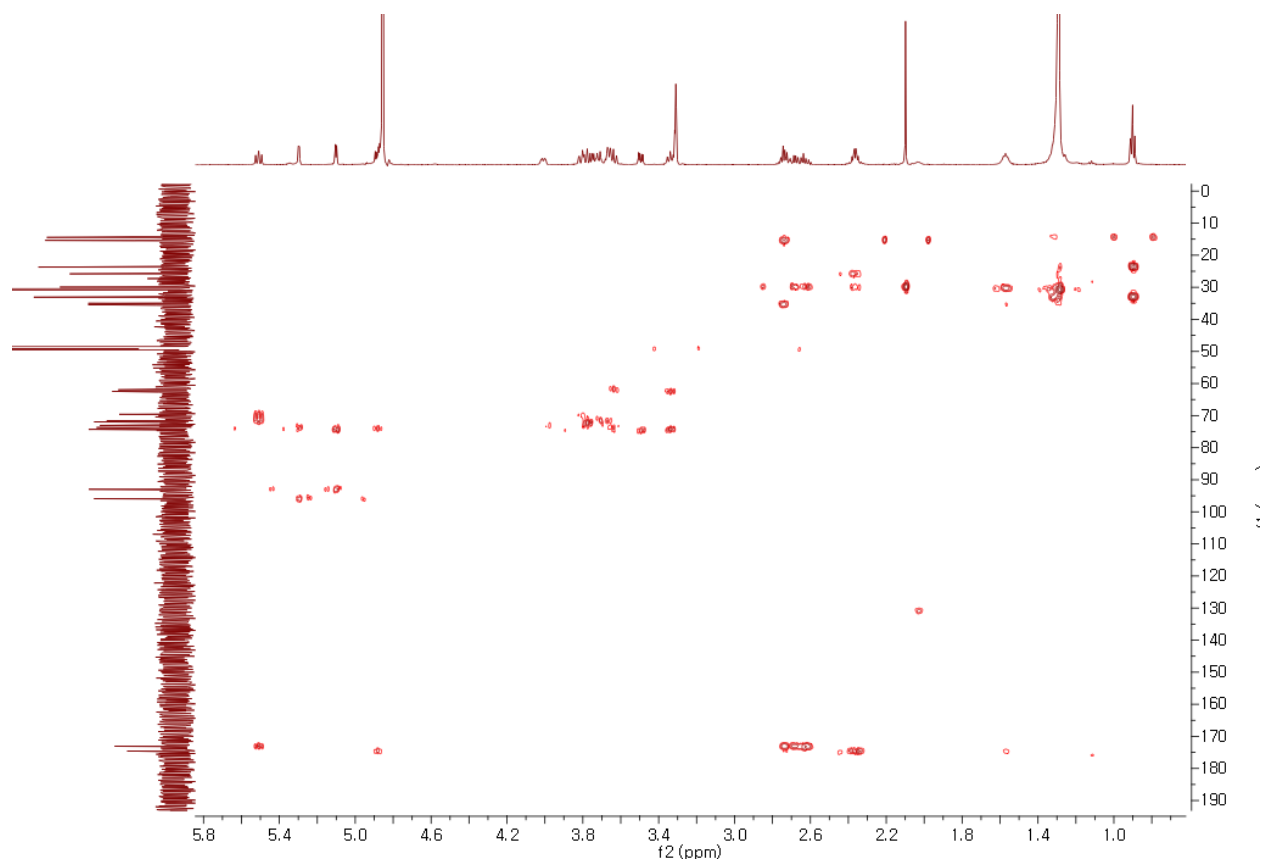

**Figure S17.** HMBC spectrum of **2** (CD<sub>3</sub>OD).

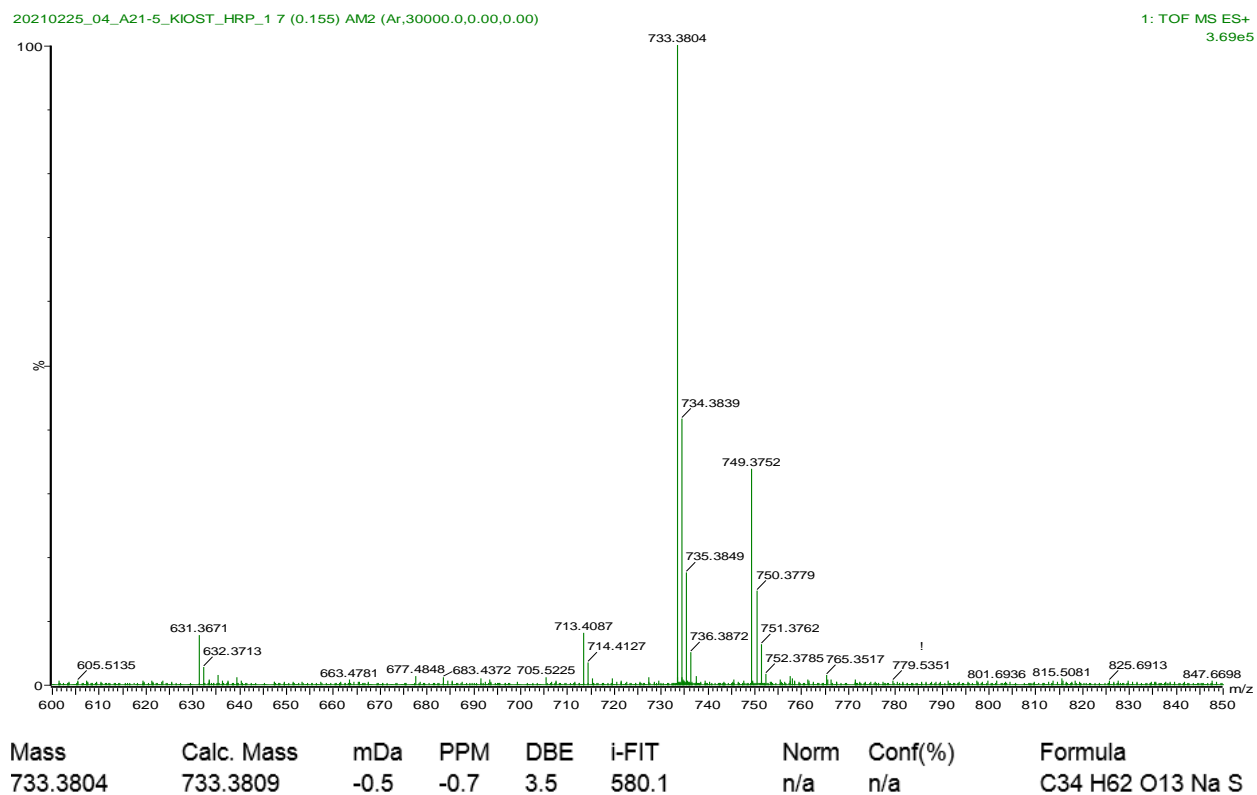

Figure S18. HRESIMS data of 2.

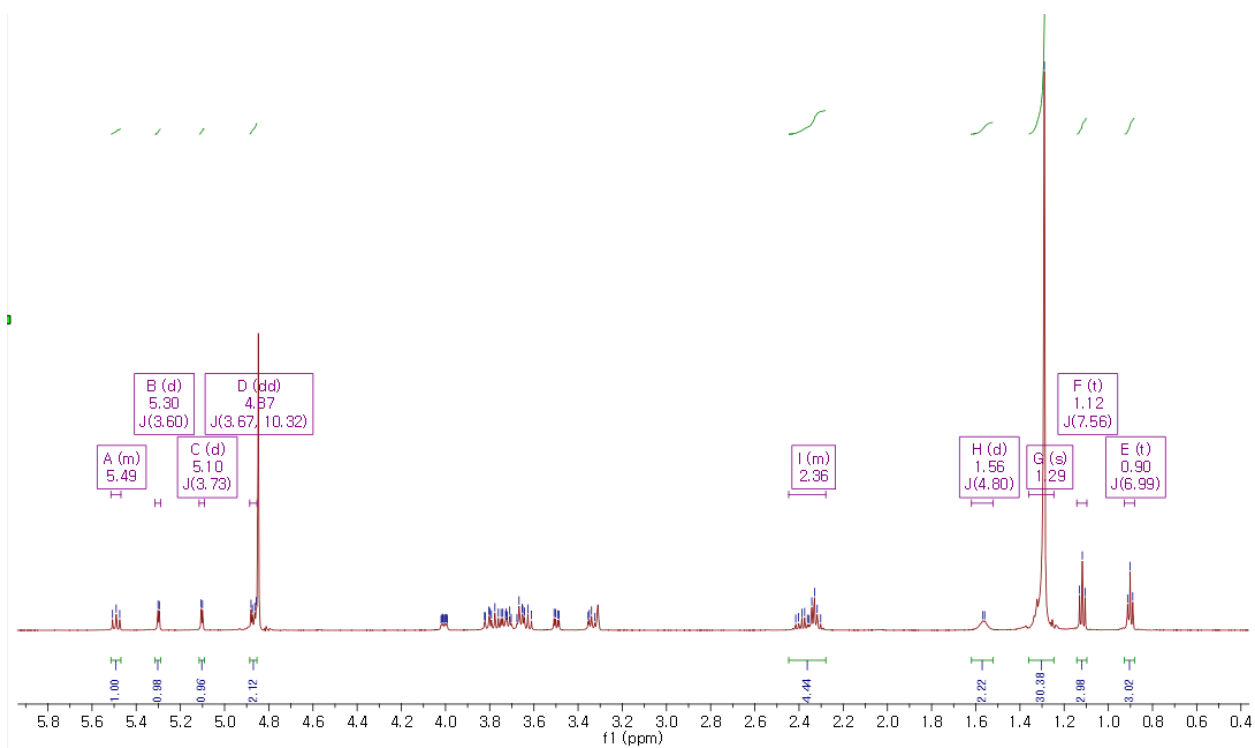

**Figure S19.**  $^1\text{H}$  NMR spectrum of 3 ( $\text{CD}_3\text{OD}$ , 600 MHz).

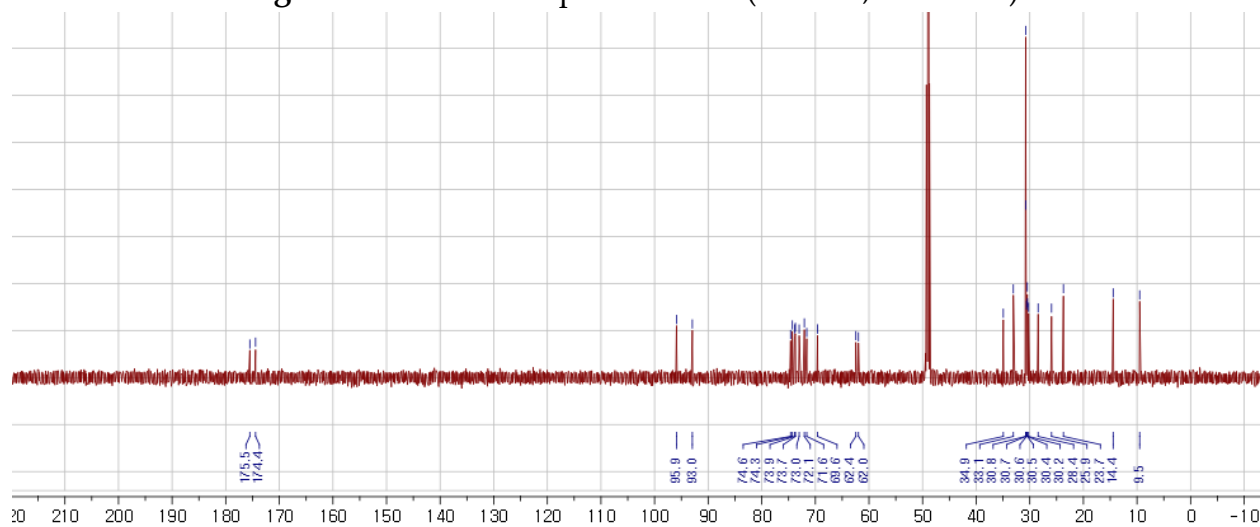

**Figure S20.**  $^{13}\text{C}$  NMR spectrum of 3 ( $\text{CD}_3\text{OD}$ , 150 MHz).

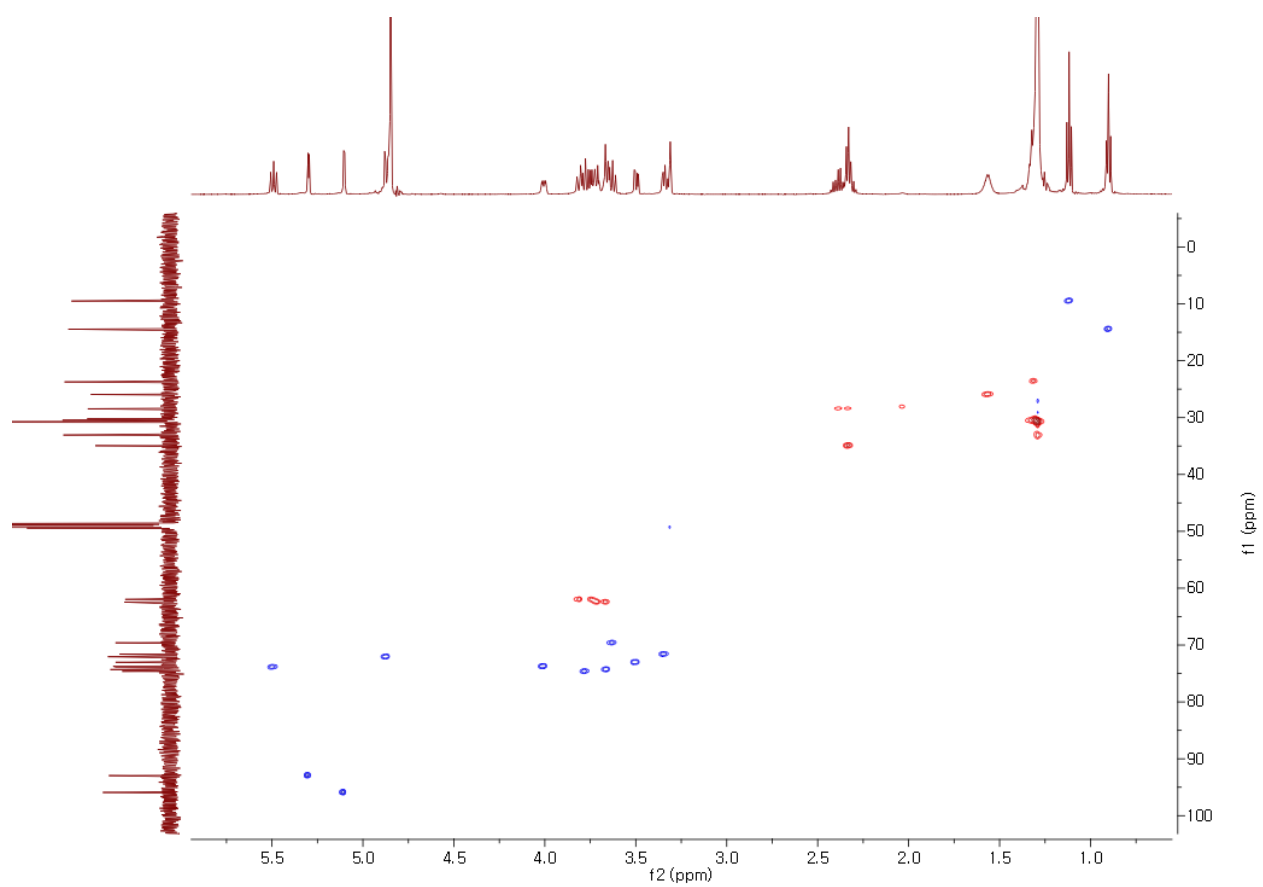

**Figure S21.** HSQC spectrum of **3** ( $\text{CD}_3\text{OD}$ ).

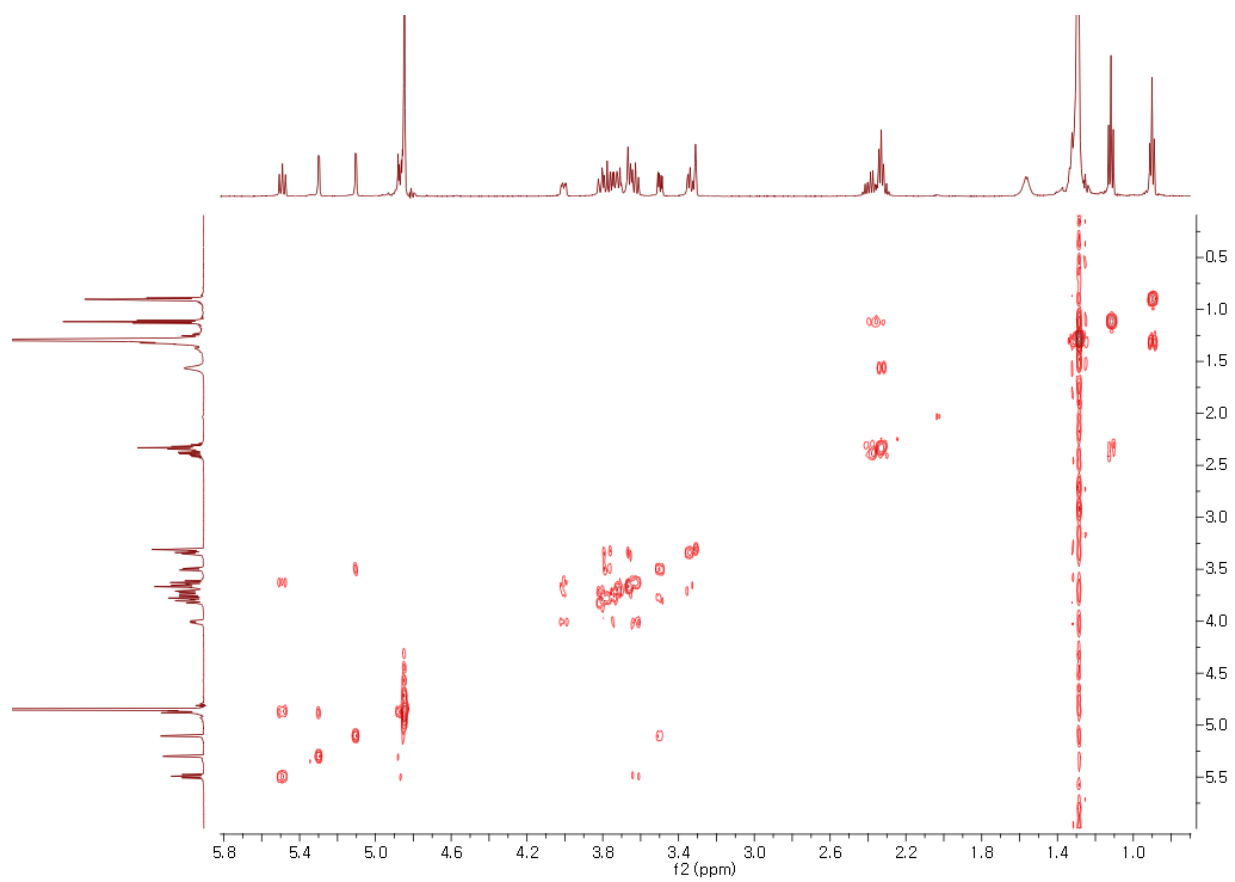

**Figure S22.**  $^1\text{H}$ - $^1\text{H}$  COSY spectrum of **3** ( $\text{CD}_3\text{OD}$ ).

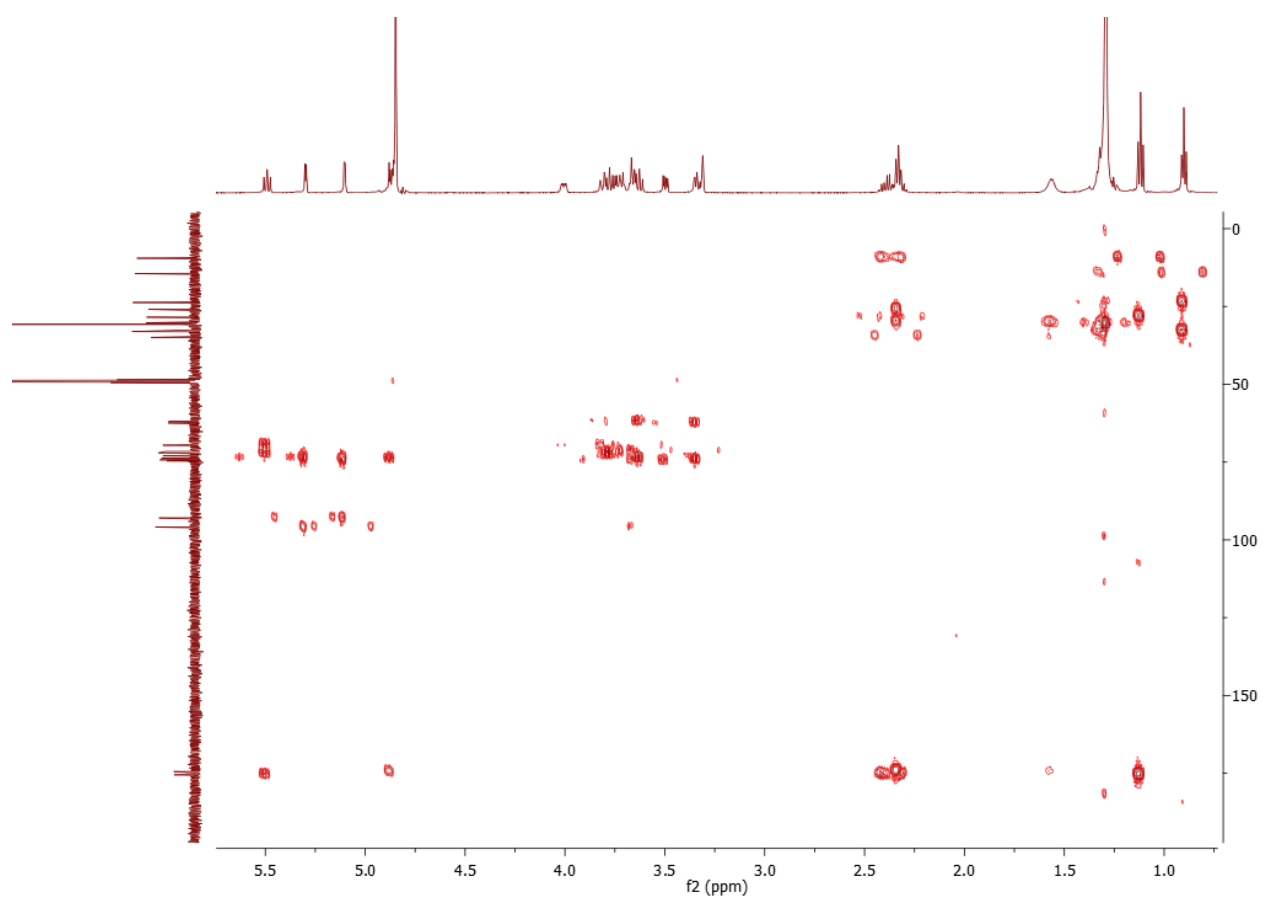

**Figure S23.** HMBC spectrum of **3** (CD<sub>3</sub>OD).

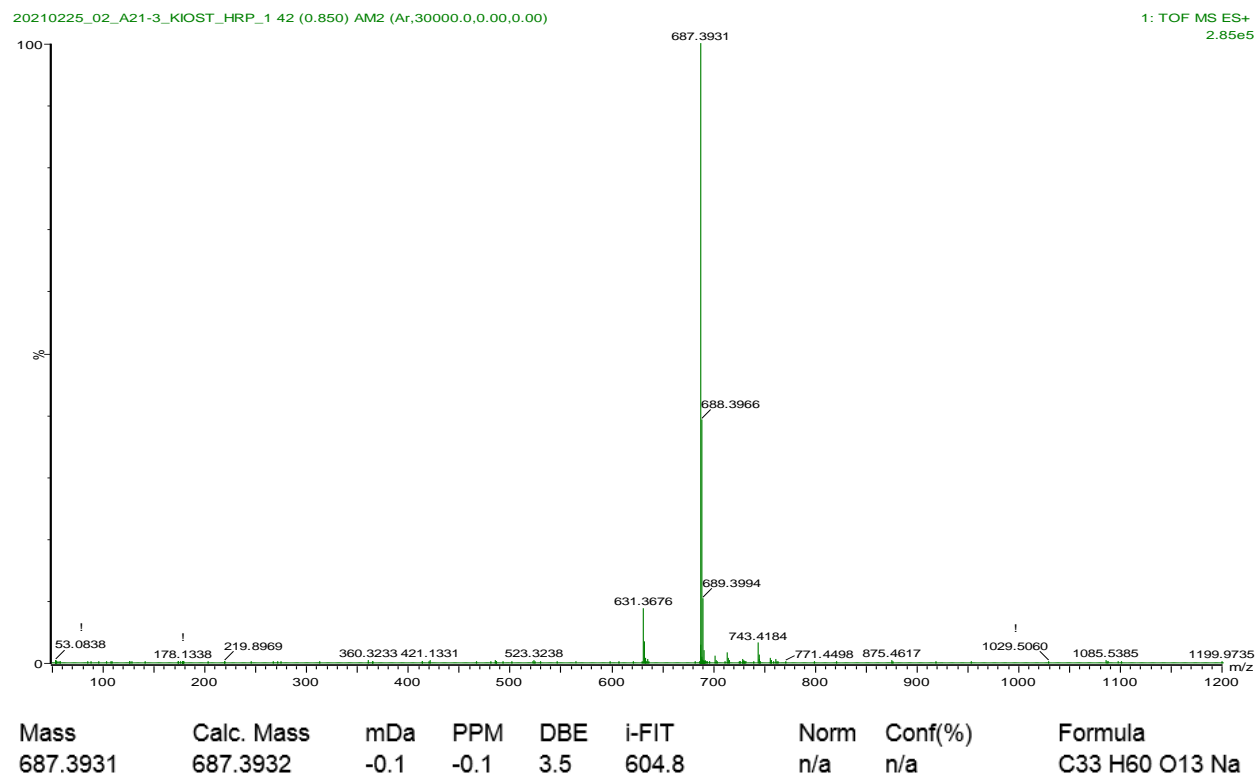

**Figure S24.** HRESIMS data of **3**.

## Sugar analysis

Column 250 x 4.6

f = 1 ml/min

t = 0 -> 50 min

10 -> 100% ACN in H<sub>2</sub>O

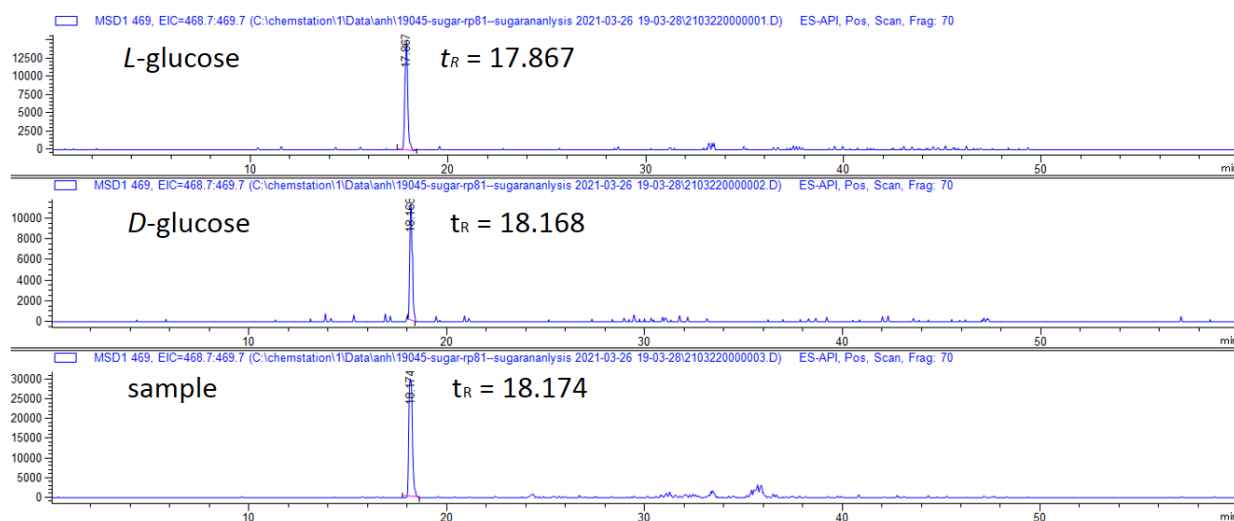

**Figure S25.** Analysis of sugar moieties.

|              |        |      |              |            |      |
|--------------|--------|------|--------------|------------|------|
| NUGC-3       |        |      |              |            |      |
| Conc.(ug/ml) | 1      |      | Conc.(ug/ml) | Adriamycin |      |
|              | Mean   | SD   |              | Mean       | SD   |
| 30           | -16.77 | 8.02 | 3            | -14.45     | 7.71 |
| 10           | 28.63  | 6.86 | 1            | -7.62      | 7.46 |
| 3            | 73.93  | 9.04 | 0.3          | 22.86      | 5.66 |
| 1            | 82.84  | 9.09 | 0.1          | 38.30      | 6.50 |
| 0.3          | 94.75  | 5.06 | 0.03         | 91.21      | 3.56 |
| GI50         | 5.062  |      | GI50         | 0.088      |      |
| GI50 $\mu$ M | 9.79   |      |              | 0.16       |      |

  

|              |        |       |              |            |      |
|--------------|--------|-------|--------------|------------|------|
| HCT-15       |        |       |              |            |      |
| Conc.(ug/ml) | 1      |       | Conc.(ug/ml) | Adriamycin |      |
|              | Mean   | SD    |              | Mean       | SD   |
| 30           | -11.58 | 10.53 | 3            | -13.39     | 3.44 |
| 10           | 21.13  | 2.87  | 1            | -0.42      | 5.46 |
| 3            | 82.62  | 3.27  | 0.3          | 11.15      | 3.39 |
| 1            | 91.65  | 5.78  | 0.1          | 25.53      | 7.97 |
| 0.3          | 100.32 | 2.57  | 0.03         | 93.14      | 3.06 |
| GI50         | 5.618  |       | GI50         | 0.070      |      |
| GI50 $\mu$ M | 10.87  |       |              | 0.13       |      |

  

|              |        |      |              |            |      |
|--------------|--------|------|--------------|------------|------|
| MDA-MB-231   |        |      |              |            |      |
| Conc.(ug/ml) | 1      |      | Conc.(ug/ml) | Adriamycin |      |
|              | Mean   | SD   |              | Mean       | SD   |
| 30           | -13.23 | 6.64 | 3            | -11.82     | 3.32 |
| 10           | 21.78  | 8.41 | 1            | -2.04      | 5.54 |
| 3            | 67.98  | 7.89 | 0.3          | 17.73      | 6.55 |
| 1            | 81.05  | 6.60 | 0.1          | 38.89      | 3.59 |
| 0.3          | 93.04  | 2.64 | 0.03         | 90.63      | 5.03 |
| GI50         | 4.157  |      | GI50         | 0.086      |      |
| GI50 $\mu$ M | 8.04   |      |              | 0.16       |      |

  

|              |       |      |              |            |      |
|--------------|-------|------|--------------|------------|------|
| NCI-H23      |       |      |              |            |      |
| Conc.(ug/ml) | 1     |      | Conc.(ug/ml) | Adriamycin |      |
|              | Mean  | SD   |              | Mean       | SD   |
| 30           | -9.90 | 4.35 | 3            | -16.77     | 7.55 |
| 10           | 26.41 | 5.72 | 1            | -8.45      | 3.60 |
| 3            | 76.13 | 6.61 | 0.3          | 18.45      | 7.82 |
| 1            | 86.44 | 8.76 | 0.1          | 27.85      | 4.89 |
| 0.3          | 93.90 | 4.21 | 0.03         | 94.57      | 6.63 |
| GI50         | 5.293 |      | GI50         | 0.073      |      |
| GI50 $\mu$ M | 10.24 |      |              | 0.14       |      |

  

|              |        |      |              |            |      |
|--------------|--------|------|--------------|------------|------|
| PC-3         |        |      |              |            |      |
| Conc.(ug/ml) | 1      |      | Conc.(ug/ml) | Adriamycin |      |
|              | Mean   | SD   |              | Mean       | SD   |
| 30           | -11.94 | 5.95 | 3            | -12.75     | 4.01 |
| 10           | 25.05  | 8.61 | 1            | -3.61      | 2.60 |
| 3            | 70.41  | 7.68 | 0.3          | 24.99      | 4.83 |
| 1            | 81.93  | 8.80 | 0.1          | 38.72      | 5.68 |
| 0.3          | 94.75  | 3.25 | 0.03         | 96.51      | 6.20 |
| GI50         | 4.547  |      | GI50         | 0.094      |      |
| GI50 $\mu$ M | 8.79   |      |              | 0.17       |      |

  

|              |        |      |              |            |      |
|--------------|--------|------|--------------|------------|------|
| ACHN         |        |      |              |            |      |
| Conc.(ug/ml) | 1      |      | Conc.(ug/ml) | Adriamycin |      |
|              | Mean   | SD   |              | Mean       | SD   |
| 30           | -12.29 | 7.98 | 3            | -11.38     | 5.10 |
| 10           | 39.66  | 4.73 | 1            | -3.93      | 3.20 |
| 3            | 67.85  | 6.68 | 0.3          | 25.42      | 4.90 |
| 1            | 83.53  | 2.69 | 0.1          | 36.65      | 8.65 |
| 0.3          | 97.09  | 2.25 | 0.03         | 94.22      | 2.84 |
| GI50         | 5.219  |      | GI50         | 0.090      |      |
| GI50 $\mu$ M | 10.09  |      |              | 0.17       |      |

Figure S26. Results of the cytotoxicity test of 1.

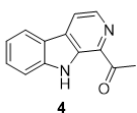

**Figure S27.**  $^1\text{H}$  NMR spectrum of **4** (DMSO- $d_6$ , 600 MHz).

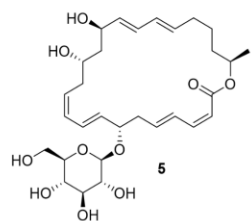

**Figure S28.**  $^1\text{H}$  NMR spectrum of **5** ( $\text{CD}_3\text{OD}$ , 600 MHz).

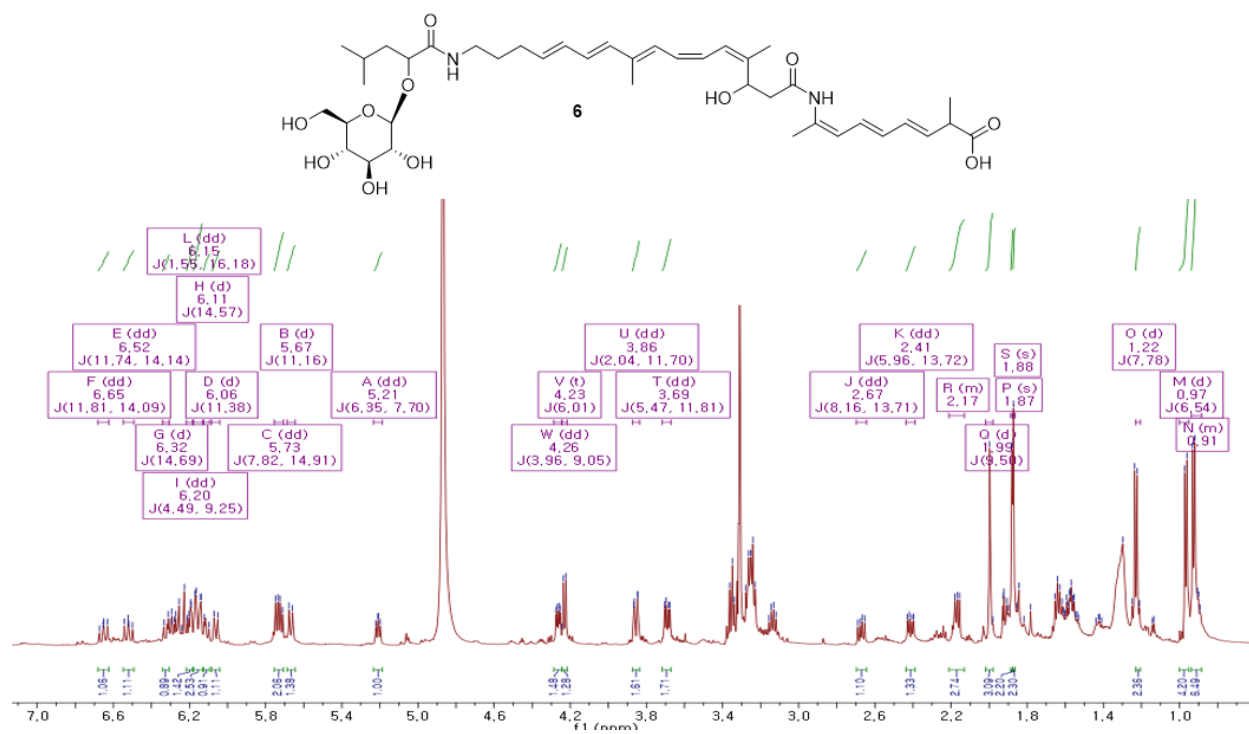

**Figure S29.**  $^1\text{H}$  NMR spectrum of **6** (CD<sub>3</sub>OD, 600 MHz).
